# Supplementary material for: Access to HIV Antiretroviral Therapy among People Living with HIV in Melbourne during the COVID-19 Pandemic
Source: Int J Environ Res Public Health. 2021 Dec 3;18(23):12765. doi: 10.3390/ijerph182312765 (PMC8657228; doi:10.3390/ijerph182312765)
Supplement: Supplementary file 1 [file ijerph-18-12765-s001.zip]

Archive with 5 entries (5 files):
- Figure S1.pdf
- Figure S2.pdf
- Figure S3.pdf
- Table S1.pdf
- Table S2.pdf
