# Supplementary material for: Access to HIV Antiretroviral Therapy among People Living with HIV in Melbourne during the COVID-19 Pandemic
Source: Int J Environ Res Public Health. 2021 Dec 3;18(23):12765. doi: 10.3390/ijerph182312765 (PMC8657228; doi:10.3390/ijerph182312765)
Supplement: Supplementary file 1 [file ijerph-18-12765-s001.zip › Figure S1.pdf]

| Cost centre | ID | Dispense date | Product                                                     | Dispense net pack quantity |
|-------------|----|---------------|-------------------------------------------------------------|----------------------------|
| GP Clinic   | 1  | 20/02/2018    | Abacavir-Lamivudine                                         | 4 packs                    |
| GP Clinic   | 1  | 20/02/2018    | Darunavir-Cobicistat                                        | 4 packs                    |
| GP Clinic   | 1  | 20/02/2018    | Dolutegravir                                                | 4 packs                    |
| GP Clinic   | 2  | 20/06/2018    | Elvitegravir-Cobicistat-Emtricitabine-Tenofovir Alafenamide | 2 packs                    |
| GP Clinic   | 2  | 13/08/2018    | Elvitegravir-Cobicistat-Emtricitabine-Tenofovir Alafenamide | 2 packs                    |
| GP Clinic   | 2  | 13/08/2018    | Elvitegravir-Cobicistat-Emtricitabine-Tenofovir Alafenamide | 2 packs                    |

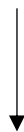

|           | ID | Dispense date | Product                                                     | Dispense net pack quantity |
|-----------|----|---------------|-------------------------------------------------------------|----------------------------|
| GP Clinic | 1  | 20/02/2018    | Abacavir-Lamivudine<br>Darunavir-Cobicistat<br>Dolutegravir | 4 packs                    |
| GP Clinic | 2  | 20/06/2018    | Elvitegravir-Cobicistat-Emtricitabine-Tenofovir Alafenamide | 2 packs                    |
| GP Clinic | 2  | 13/08/2018    | Elvitegravir-Cobicistat-Emtricitabine-Tenofovir Alafenamide | 4 packs                    |

**Figure S1.** An example of the data cleaning process demonstrating combining multiple drugs recorded on the same date. If the drugs are different, they are combined as a single combination therapy. If the drugs are the same, they are combined as a single dispensing record and the dispense net pack quantity is multiplied.
