# Supplementary material for: Access to HIV Antiretroviral Therapy among People Living with HIV in Melbourne during the COVID-19 Pandemic
Source: Int J Environ Res Public Health. 2021 Dec 3;18(23):12765. doi: 10.3390/ijerph182312765 (PMC8657228; doi:10.3390/ijerph182312765)
Supplement: Supplementary file 1 [file ijerph-18-12765-s001.zip › Table S1.pdf]

**Table S1. Medication Possession Ratios (Alternative approach)**

| <b>GP and MSHC patients</b> | <b>Years</b> | <b>Mean</b> | <b>Standard deviation</b> | <b>Median</b> | <b>IQR</b>  |
|-----------------------------|--------------|-------------|---------------------------|---------------|-------------|
|                             | 2018         | 0.92        | 0.24                      | 0.99          | 0.82 – 0.99 |
|                             | 2019         | 0.94        | 0.23                      | 0.99          | 0.82 – 0.99 |
|                             | 2020         | 0.92        | 0.25                      | 0.99          | 0.82 – 0.99 |

GP = general practice; IQR = Interquartile range; MSHC = Melbourne Sexual Health Centre

Alternative approach = MPR calculated by the total number of days covered by every ART script in a year divided by 365
