# Supplementary material for: Access to HIV Antiretroviral Therapy among People Living with HIV in Melbourne during the COVID-19 Pandemic
Source: Int J Environ Res Public Health. 2021 Dec 3;18(23):12765. doi: 10.3390/ijerph182312765 (PMC8657228; doi:10.3390/ijerph182312765)
Supplement: Supplementary file 1 [file ijerph-18-12765-s001.zip › Table S2.pdf]

**Table S2. Medication Possession Ratios for individuals with data for both 2019 and 2020 (N=2454)**

| GP and MSHC patients | Years | Mean (SD)   | 95% Confidence interval | Median | IQR         |
|----------------------|-------|-------------|-------------------------|--------|-------------|
|                      | 2018  | 1.05 (1.81) | 0.99 to 1.11            | 0.99   | 0.91 – 1.07 |
|                      | 2019  | 1.07 (2.14) | 0.99 to 1.14            | 0.99   | 0.91 – 1.07 |
|                      | 2020  | 1.13 (3.91) | 1.00 to 1.26            | 0.99   | 0.90 – 1.07 |

GP = general practice; IQR = Interquartile range; MSHC = Melbourne Sexual Health Centre
